# Supplementary material for: Characterization of a Riboflavin-Producing Mutant of Bacillus subtilis Isolated by Droplet-Based Microfluidics Screening
Source: MDPI journal article supplement (doi:10.3390/microorganisms11041070), 2023-04-20
Supplement: s1 [file s1]

## *Supplementary Material*

### 1. Supplementary Table S1. Bacterial strains and plasmids used in this study

| Name                   | Relevant phenotype                                                | Source /reference                                                        |
|------------------------|-------------------------------------------------------------------|--------------------------------------------------------------------------|
| Strains                |                                                                   |                                                                          |
| <i>B. subtilis</i> 168 | Wide-type strain, <i>trpC2</i>                                    | Lab stock (from China General Microbiological Culture Collection Center) |
| <i>BS168DR</i>         | neomycin resistance                                               | Lab stock & [12]                                                         |
| <i>S1</i>              | Mutated from BS168DR, erythromycin and chloramphenicol resistance | Lab stock & [11]                                                         |
| <i>U1</i>              | Mutated from S1, erythromycin and chloramphenicol resistance      | This study                                                               |
| <i>U2</i>              | Mutated from S1, erythromycin and chloramphenicol resistance      | This study                                                               |
| <i>U3</i>              | Mutated from S1, erythromycin and chloramphenicol resistance      | This study                                                               |
| <i>U4</i>              | Mutated from S1, erythromycin and chloramphenicol resistance      | This study                                                               |
| <i>U5</i>              | Mutated from S1, erythromycin and chloramphenicol resistance      | This study                                                               |
| <i>U6</i>              | Mutated from S1, erythromycin and chloramphenicol resistance      | This study                                                               |
| <i>U7</i>              | Mutated from S1, erythromycin and chloramphenicol resistance      | This study                                                               |

|                 |                                                              |            |
|-----------------|--------------------------------------------------------------|------------|
| <i>U8</i>       | Mutated from S1, erythromycin and chloramphenicol resistance | This study |
| <i>sinRm</i>    | BS168DR, <i>sinR</i> *(G89R), neomycin resistance            | This study |
| <i>icdm</i>     | BS168DR, <i>icd</i> *(D28E), neomycin resistance             | This study |
| <i>sinRm-CR</i> | BS168DR, <i>sinR</i> *(G89R)-CR, chloramphenicol resistance  | This study |
| <i>icdm-CR</i>  | BS168DR, <i>icd</i> *(D28E)-CR, chloramphenicol resistance   | This study |
| <i>sim</i>      | <i>icdm</i> , <i>sinR</i> *(G89R), neomycin resistance       | This study |

The resistance concentration used in this study were 60 µg/ml of neomycin, 20 µg/ml of erythromycin and 20 µg/ml of chloramphenicol respectively.

## 2. Supplemental Table S2. Primers used in this study

| Name              | Sequence (5'–3')                                                                                                     |
|-------------------|----------------------------------------------------------------------------------------------------------------------|
| <i>sinRm</i> -UP1 | CGTCGATCAAGGCTTAGGCT                                                                                                 |
| <i>sinRm</i> -UP2 | TCCAATTTTCGTTTGTTGAACTAATGGGTGCTTTAGTT<br>GAAGACCATTCACTATCTAATTGACCATCGTATTCG                                       |
| CR1               | TCTTCAACTAAAGCACCCATTAGTTCAACA                                                                                       |
| <i>sinRm</i> -CR2 | TCGATACCCTGGATGTCATCGCATCGCGAACCAATTT<br>CTCCCATTCACCTATCTAATTGACCATCGTATTCGGTTT<br>CATGTTTATTCATTCAGTTTTTCGTGCGGACT |
| <i>sinRm</i> -DN1 | GAGAAATTGGTTCGCGATGCGAT                                                                                              |
| <i>sinRm</i> -DN2 | GCTTTTGTGACGATCAGCAGC                                                                                                |
| <i>icdm</i> -UP1  | CATCCCATGGCTGCTCTTCG                                                                                                 |

|          |                                                                                                                    |
|----------|--------------------------------------------------------------------------------------------------------------------|
| icdm-UP2 | AATTTTCGTTTGTTGAACTAATGGGTGCTTTAGTTGA<br>AGAGTTTGGTACGTTTAATACTCCGTTAGAGACTGTA<br>A                                |
| icdm-CR2 | CCGGTTCCTTCTCCTTCGATAAATGGGATAATCGGGT<br>TGTTTGGTACGTTTAATACTCCGTTAGAGACTGTAAT<br>TTTTTTATTCATTCAGTTTTTCGTGCGGACTG |
| icdm-DN1 | AACCCGATTATCCCATTTATCGAAGG                                                                                         |
| icdm-DN2 | AGGACATTCCGACAATTCGCC                                                                                              |

### 3. Part of the fluorescence microscopy images

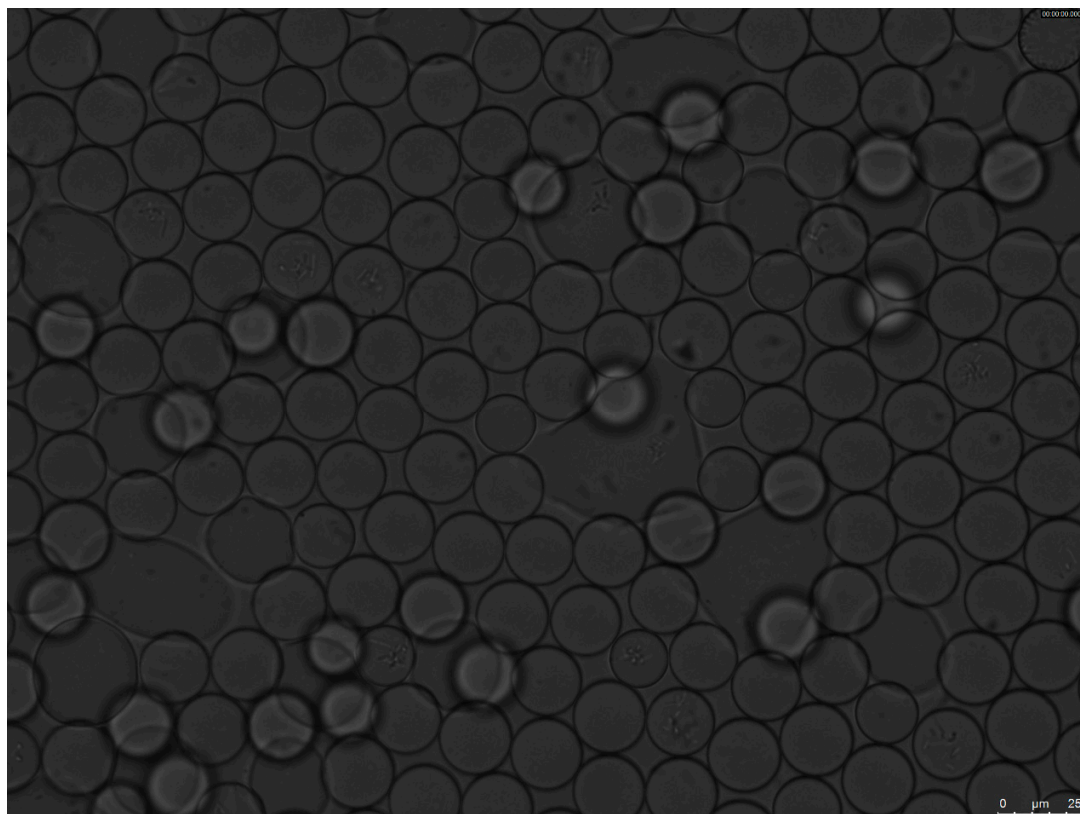

Figure S1 microscopy images at 4h

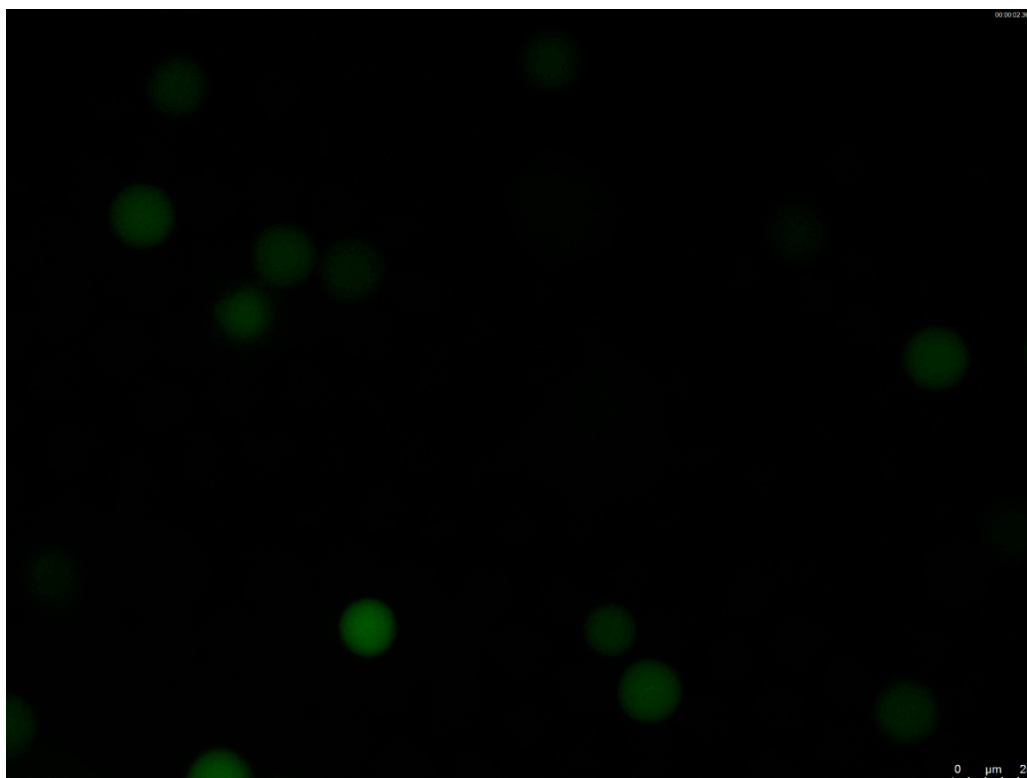

Figure S2 fluorescence microscopy images at 4h

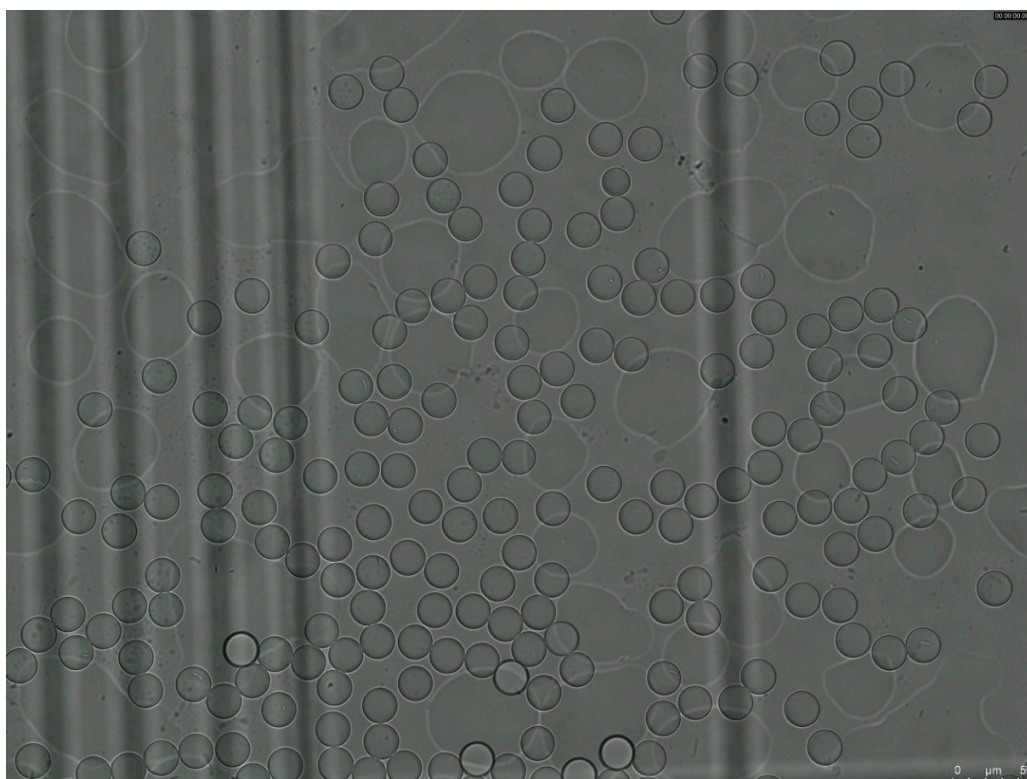

Figure S3 microscopy images at 0h

## References

11. Shouying, F.; Miaomiao, X.; Yining, Z.; Chuan, L.; Ran, T.; Dawei, Z. Establishment and Application of High-throughput Screening Method of Riboflavin Industrial Strain. *Biotechnol. Bull.* **2020**, *36*, 47.
12. Dawei, Z.; Yuan, S.; Bin, Y.; Chuan, L. Engineering Strain of *Bacillus subtilis* with High Vitamin B2 Production, Its Construction and Application. CN Patent 113025550B, 10 September 2021.
